# Supplementary material for: Coordinated Optimization of Visual Cortical Maps (I) Symmetry-based Analysis
Source: PLOS journal article supplement (doi:10.1371/journal.pcbi.1002466), 2012-11-08
Supplement: S9 (10.1371/journal.pcbi.1002466.s009) [file journal.pcbi.1002466.s009]

301 Moved Permanently

# Moved Permanently

The document has moved here.

---

Apache Server at www.ploscompbiol.org Port 80
