# Supplementary material for: Coordinated Optimization of Visual Cortical Maps (I) Symmetry-based Analysis
Source: PLOS journal article supplement (doi:10.1371/journal.pcbi.1002466), 2012-11-08
Supplement: S10 (10.1371/journal.pcbi.1002466.s010) [file journal.pcbi.1002466.s010]

## Text S2: Supporting Information for

### Coordinated optimization of visual cortical maps

#### (I) Symmetry-based analysis

## 1 Amplitude equations for higher order coupling energies

Here, we list the amplitude equations for the OP dynamics in case of the high order inter-map coupling energies  $U = \epsilon|\nabla z \cdot \nabla o|^4$  and  $U = \tau|z|^4 o^4$ .

$$\begin{aligned}
\partial_t A_i &= r_z A_i - \sum_j |A_j|^2 A_i \left( g_{ij} + \delta^4 g'_{ij} + \delta^2 \sum_u g_{iju} |B_u|^2 \right. \\
&\quad \left. + \delta g''_{ij} (B_1 B_2 B_3 + \bar{B}_1 \bar{B}_2 \bar{B}_3) + \sum_{u,v} g_{ijuv} |B_u|^2 |B_v|^2 \right) \\
&\quad - \sum_j |A_{j-}|^2 A_i \left( g_{ij-} + \delta^4 g'_{ij-} + \delta^2 \sum_u g_{ij-u} |B_u|^2 \right. \\
&\quad \left. + \delta g''_{ij-} (B_1 B_2 B_3 + \bar{B}_1 \bar{B}_2 \bar{B}_3) + \sum_{u,v} g_{ij-uv} |B_u|^2 |B_v|^2 \right) \\
&\quad - \sum_j A_j A_{j-} \bar{A}_{i-} \left( f_{ij} + \delta^4 f'_{ij} + \delta^2 \sum_u f_{iju} |B_u|^2 \right. \\
&\quad \left. + \delta f''_{ij} (B_1 B_2 B_3 + \bar{B}_1 \bar{B}_2 \bar{B}_3) + \sum_{u,v} f_{ijuv} |B_u|^2 |B_v|^2 \right) \\
&\quad - \sum_{j \neq l} A_i A_j \bar{A}_l \left( \sum_u h_{ijlu}^{(1)} \bar{B}_j B_l |B_u|^2 + \delta^2 h_{ijl}^{(1)} \bar{B}_j B_l \right) \\
&\quad - \sum_{j,l} A_i A_{j-} \bar{A}_l \left( \sum_u h_{ij-lu}^{(1)} B_j B_l |B_u|^2 + \delta^2 h_{ij-l}^{(1)} B_j B_l \right) \\
&\quad - \sum_{j,l} A_i A_j \bar{A}_{l-} \left( \sum_u h_{ijl-u}^{(1)} \bar{B}_j \bar{B}_l |B_u|^2 + \delta^2 h_{ijl-}^{(1)} \bar{B}_j \bar{B}_l \right) \\
&\quad - \sum_{j \neq l} A_i A_{j-} \bar{A}_{l-} \left( \sum_u h_{ij-l-u}^{(1)} B_j \bar{B}_l |B_u|^2 + \delta^2 h_{ij-l-}^{(1)} B_j \bar{B}_l \right) \\
&\quad - \sum_{l,j \neq k} A_j A_l \bar{A}_k h_{ijlk}^{(2)} \bar{B}_j \bar{B}_l B_k B_i - \sum_{l,j,k} A_{j-} A_l \bar{A}_k h_{ij-lk}^{(2)} B_j \bar{B}_l B_k B_i \\
&\quad - \sum_{l,j \neq k} A_j A_l \bar{A}_{k-} h_{ijlk-}^{(2)} \bar{B}_j \bar{B}_l \bar{B}_k B_i - \sum_{l,j \neq k} A_{j-} A_l \bar{A}_k h_{ij-l-k}^{(2)} B_j B_l B_k B_i
\end{aligned}$$

$$\begin{aligned}
& - \sum_{l,j \neq k} A_j - A_l \bar{A}_k - h_{ij-lk}^{(2)} B_j \bar{B}_l \bar{B}_k B_i - \sum_{l,j \neq k} A_j - A_l - \bar{A}_k - h_{ij-l-k}^{(2)} B_j B_l \bar{B}_k B_i \\
& - \sum_{j,l} |A_j|^2 A_l \left( \sum_u h_{ijlu}^{(3)} |B_u|^2 \bar{B}_l B_i + \delta^2 h_{ijl}^{(3)} \bar{B}_l B_i \right) \\
& - \sum_{j,l} |A_j^-|^2 A_l^- \left( \sum_u h_{ij-lu}^{(3)} |B_u|^2 \bar{B}_l B_i + \delta^2 h_{ij-l}^{(3)} \bar{B}_l B_i \right) \\
& - \sum_{j,l} |A_j|^2 A_l^- \left( \sum_u h_{ijl-u}^{(3)} |B_u|^2 B_l B_i + \delta^2 h_{ijl}^{(3)} B_l B_i \right) \\
& - \sum_{j,l} |A_j^-|^2 A_l^- \left( \sum_u h_{ij-l-u}^{(3)} |B_u|^2 B_l B_i + \delta^2 h_{ij-l}^{(3)} B_l B_i \right) \\
& - \sum_{j,u} \delta h_{iju}^{(4)} A_i \bar{A}_j A_u B_{u+1} B_{u+2} B_j - \sum_{j,u} \delta h_{iuj}^{(4)} A_i A_j \bar{A}_u \bar{B}_{u+1} \bar{B}_{u+2} \bar{B}_j \\
& - \sum_{j,u} \delta h_{ij-u}^{(4)} A_i \bar{A}_j - A_u B_{u+1} B_{u+2} \bar{B}_j - \sum_{j,u} \delta h_{ij-u}^{(4)} A_i A_j - \bar{A}_u \bar{B}_{u+1} \bar{B}_{u+2} \bar{B}_j \\
& - \sum_{j,u} \delta h_{iju}^{(4)} A_i \bar{A}_j A_u - \bar{B}_{u+1} \bar{B}_{u+2} B_j - \sum_{j,u} \delta h_{iju}^{(4)} A_i A_j \bar{A}_u - B_{u+1} B_{u+2} B_j \\
& - \sum_{j,u} \delta h_{ij-u}^{(4)} A_i \bar{A}_j - A_u - \bar{B}_{u+1} \bar{B}_{u+2} \bar{B}_j - \sum_{j,u} \delta h_{ij-u}^{(4)} A_i A_j - \bar{A}_u - B_{u+1} B_{u+2} \bar{B}_j \\
& - \sum_u h_{iu}^{(5)} A_i A_u \bar{A}_{(u+1)} - B_{u+2} B_1 B_2 B_3 - \sum_u h_{iu}^{(5)} A_i A_u - \bar{A}_{(u+1)} \bar{B}_{u+2} B_1 B_2 B_3 \\
& - \sum_u \tilde{h}_{iu}^{(5)} A_i A_u \bar{A}_{(u+1)} - B_{u+2} \bar{B}_1 \bar{B}_2 \bar{B}_3 - \sum_u \tilde{h}_{iu}^{(5)} A_i A_u - \bar{A}_{(u+1)} \bar{B}_{u+2} \bar{B}_1 \bar{B}_2 \bar{B}_3 \\
& - \sum_u \delta^3 h^{(5)} A_i A_u \bar{A}_{(u+1)} - B_{u+2} - \sum_u \delta^3 h^{(5)} A_i A_u - \bar{A}_{(u+1)} \bar{B}_{u+2} \\
& - \sum_{j,u} \delta h_{iju}^{(6)} \bar{A}_j A_u A_{u+1} B_{u+2} B_j B_i - \sum_{j,u} \delta h_{ij-u}^{(6)} \bar{A}_j - A_u A_{u+1} B_{u+2} \bar{B}_j B_i \\
& - \sum_{j,u} \delta h_{iju}^{(6)} \bar{A}_j A_u - A_{(u+1)} - \bar{B}_{u+2} B_j B_i - \sum_{j,u} \delta h_{ij-u}^{(6)} \bar{A}_j - A_u - A_{(u+1)} - \bar{B}_{u+2} \bar{B}_j B_i \\
& - \sum_{j,u} \delta h_{iju}^{(7)} |A_j|^2 A_u B_{u+1} B_{u+2} B_i - \sum_{j,u} \delta h_{ij-u}^{(7)} |A_j^-|^2 A_u B_{u+1} B_{u+2} B_i \\
& - \sum_{j,u} \delta h_{ij-u}^{(7)} |A_j|^2 A_u - \bar{B}_{u+1} \bar{B}_{u+2} B_i - \sum_{j,u} \delta h_{ij-u}^{(7)} |A_j^-|^2 A_u - \bar{B}_{u+1} \bar{B}_{u+2} B_i \\
& - \sum_{j,u} \delta h_{ij}^{(8)} A_j^2 \bar{A}_{i+2} \bar{B}_j^2 \bar{B}_{i+1} - \sum_{j,u} \delta h_{ij}^{(8)} A_j^2 - \bar{A}_{i+2} B_j^2 \bar{B}_{i+1} \\
& - \sum_{j,u} \delta^3 h_{ij}^{(9)} |A_j|^2 A_{(i+2)} - \bar{B}_{i+1} - \sum_{j,u} \delta^3 h_{ij}^{(9)} |A_j^-|^2 A_{(i+2)} - \bar{B}_{i+1}
\end{aligned}$$

where the indices are considered to be cyclic i.e.  $j + 3 = j$ . All sums are considered to run from 1 to 3. In the article, these amplitude equations are specified in case of OD stripes, Eq. (109), OD hexagons, Eq. (110), or a constant OD solution, Eq (111).

## 2 Coupling coefficients

In the following, we list the non-zero elements of the coupling coefficients.

|                                           |                                                               |                                             |                                           |
|-------------------------------------------|---------------------------------------------------------------|---------------------------------------------|-------------------------------------------|
| $g_{ii} = 1$                              | $g_{ij} = 2$                                                  | $g'_{ii} = \tau$                            | $g'_{ij} = 2\tau$                         |
| $g_{iji} = g_{ijj} = g_{iju} = 24\tau$    | $g_{iii} = g_{iij} = 12\tau$                                  |                                             |                                           |
| $g''_{ij} = 48\tau$                       | $g''_{ii} = 24\tau$                                           |                                             |                                           |
| $g_{ijii} = 6\epsilon + 12\tau$           | $g_{ijij} = 33\epsilon + 48\tau$                              | $g_{ijjj} = 6\epsilon + 12\tau$             | $g_{ijiu} = 3\epsilon + 48\tau$           |
| $g_{ijju} = -3\epsilon + 48\tau$          | $g_{ijuu} = 1.5\epsilon + 12\tau$                             |                                             |                                           |
| $f_{ij} = 2$                              | $f'_{ij} = 2\tau$                                             |                                             |                                           |
| $f_{iju} = f_{ijj} = f_{iji} = 24\tau$    | $f''_{ij} = 48\tau$                                           |                                             |                                           |
| $f_{ijii} = 12\tau$                       | $f_{ijij} = 48\tau + 33\epsilon$                              | $f_{ijjj} = 12\tau + 6\epsilon$             | $f_{ijiu} = 48\tau + 3\epsilon$           |
| $f_{ijju} = 48\tau - 3\epsilon$           | $f_{ijuu} = 12\tau + 1.5\epsilon$                             |                                             |                                           |
| $h_{ijli}^{(1)} = 15\epsilon + 48\tau$    | $h_{ijlj}^{(1)} = 0.75\epsilon + 24\tau$                      | $h_{ijul}^{(1)} = 0.75\epsilon + 24\tau$    |                                           |
| $h_{ijii}^{(1)} = 21\epsilon + 24\tau$    | $h_{ijij}^{(1)} = 9.75\epsilon + 24\tau$                      | $h_{ijil}^{(1)} = 1.5\epsilon + 48\tau$     |                                           |
| $h_{iiji}^{(1)} = 10.5\epsilon + 12\tau$  | $h_{iijj}^{(1)} = 4.875\epsilon + 12\tau$                     | $h_{iiju}^{(1)} = 0.75\epsilon + 24\tau$    |                                           |
| $h_{ij-li}^{(1)} = 15\epsilon + 48\tau$   | $h_{ij-lj}^{(1)} = h_{ij-ll}^{(1)} = 0.75\epsilon + 24\tau$   |                                             |                                           |
| $h_{ijl-i}^{(1)} = 15\epsilon + 48\tau$   | $h_{ijl-j}^{(1)} = h_{ijl-l}^{(1)} = 0.75\epsilon + 24\tau$   |                                             |                                           |
| $h_{ij-l-i}^{(1)} = 15\epsilon + 48\tau$  | $h_{ij-l-j}^{(1)} = h_{ij-l-l}^{(1)} = 0.75\epsilon + 24\tau$ |                                             |                                           |
| $h_{ijl}^{(1)} = 24\tau$                  | $h_{iij}^{(1)} = 12\tau$                                      | $h_{ij-l}^{(1)} = h_{ii-j}^{(1)} = 24\tau$  | $h_{ij-j}^{(1)} = 12\tau$                 |
| $h_{ijl-}^{(1)} = 24\tau$                 | $h_{iij-}^{(1)} = 12\tau$                                     | $h_{iii-}^{(1)} = 6\tau$                    | $h_{iji-}^{(1)} = 24\tau$                 |
| $h_{ij-l-}^{(1)} = 24\tau$                | $h_{ii-j-}^{(1)} = 24\tau$                                    | $h_{ij-i-}^{(1)} = 24\tau$                  |                                           |
| $h_{ijli}^{(2)} = 7.5\epsilon + 24\tau$   | $h_{iijj}^{(2)} = 10.5\epsilon + 12\tau$                      | $h_{ij-li}^{(2)} = 7.5\epsilon + 24\tau$    | $h_{ii-ij}^{(2)} = 21\epsilon + 24\tau$   |
| $h_{ijli-}^{(2)} = 15\epsilon + 48\tau$   | $h_{iijj-}^{(2)} = 8.25\epsilon + 12\tau$                     | $h_{ijjl-}^{(2)} = 3.75\epsilon + 12\tau$   |                                           |
| $h_{ij-l-i}^{(2)} = 7.5\epsilon + 24\tau$ | $h_{ij-l-j}^{(2)} = 7.5\epsilon + 24\tau$                     | $h_{ij-l-l}^{(2)} = 7.5\epsilon + 24\tau$   |                                           |
| $h_{ij-ll-}^{(2)} = 7.5\epsilon + 24\tau$ | $h_{ij-li-}^{(2)} = 15\epsilon + 48\tau$                      |                                             |                                           |
| $h_{ij-l-i-}^{(2)} = 15\epsilon + 48\tau$ | $h_{ij-j-i-}^{(2)} = 8.25\epsilon + 12\tau$                   | $h_{ij-j-l-}^{(2)} = 3.75\epsilon + 12\tau$ |                                           |
| $h_{ijli}^{(3)} = 0.75\epsilon + 24\tau$  | $h_{ijlj}^{(3)} = 15\epsilon + 48\tau$                        | $h_{ijul}^{(3)} = 0.75\epsilon + 24\tau$    | $h_{ijji}^{(3)} = 4.875\epsilon + 12\tau$ |
| $h_{ijjj}^{(3)} = 10.5\epsilon + 12\tau$  | $h_{ijjl}^{(3)} = 0.75\epsilon + 24\tau$                      | $h_{ijl}^{(3)} = 24\tau$                    | $h_{ijj}^{(3)} = 12\tau$                  |
| $h_{iiji}^{(3)} = 12\epsilon + 24\tau$    | $h_{iijj}^{(3)} = 9.75\epsilon + 24\tau$                      | $h_{iijl}^{(3)} = 1.5\epsilon + 48\tau$     | $h_{iij}^{(3)} = 24\tau$                  |
| $h_{ii-jj}^{(3)} = 21\epsilon + 24\tau$   | $h_{ii-jj}^{(3)} = 9.75\epsilon + 24\tau$                     | $h_{ii-jl}^{(3)} = 1.5\epsilon + 48\tau$    |                                           |
| $h_{ij-jj}^{(3)} = 9.75\epsilon + 24\tau$ | $h_{ij-jj}^{(3)} = 21\epsilon + 24\tau$                       | $h_{ij-jl}^{(3)} = 15\epsilon + 48\tau$     |                                           |
| $h_{ij-li}^{(3)} = 0.75\epsilon + 24\tau$ | $h_{ij-lj}^{(3)} = 0.75\epsilon + 24\tau$                     | $h_{ij-ll}^{(3)} = 15\epsilon + 48\tau$     |                                           |

$$\begin{array}{llll}
h_{ii-j}^{(3)} = 24\tau & h_{ij-j}^{(3)} = 24\tau & h_{ij-l}^{(3)} = 24\tau & \\
h_{iii-i}^{(3)} = 16\epsilon + 8\tau & h_{iii-j}^{(3)} = 12\epsilon + 24\tau & h_{iji-i}^{(3)} = 4\epsilon + 8\tau & h_{iji-j}^{(3)} = 16.5\epsilon + 24\tau \\
h_{iji-l}^{(3)} = 1.5\epsilon + 24\tau & h_{iij-i}^{(3)} = 21\epsilon + 24\tau & h_{iij-j}^{(3)} = 9.75\epsilon + 24\tau & h_{iij-l}^{(3)} = 1.5\epsilon + 48\tau \\
h_{ijj-i}^{(3)} = 9.75\epsilon + 24\tau & h_{ijj-j}^{(3)} = 21\epsilon + 24\tau & h_{ijj-l}^{(3)} = 1.5\epsilon + 48\tau & h_{ijj-i}^{(3)} = 0.75\epsilon + 24\tau \\
h_{ijl-j}^{(3)} = 15\epsilon + 48\tau & h_{ijl-l}^{(3)} = 0.75\epsilon + 24\tau & h_{iii-}^{(3)} = 12\tau & h_{iji-}^{(3)} = 12\tau \\
h_{iij-}^{(3)} = 24\tau & h_{iij-}^{(3)} = 24\tau & h_{ijl-}^{(3)} = 24\tau & \\
h_{ii-i-i}^{(3)} = 8\epsilon + 4\tau & h_{ii-i-j}^{(3)} = 6\epsilon + 12\tau & h_{ii-j-i}^{(3)} = 21\epsilon + 24\tau & h_{ii-j-j}^{(3)} = 9.75\epsilon + 24\tau \\
h_{ii-j-l}^{(3)} = 1.5\epsilon + 48\tau & h_{ij-i-i}^{(3)} = 4\epsilon + 8\tau & h_{ij-i-j}^{(3)} = 16.5\epsilon + 24\tau & h_{ij-l-i}^{(3)} = 1.5\epsilon + 24\tau \\
h_{ij-j-i}^{(3)} = 4.875\epsilon + 24\tau & h_{ij-j-j}^{(3)} = 10.5\epsilon + 12\tau & h_{ij-j-l}^{(3)} = 0.75\epsilon + 24\tau & h_{ij-l-i}^{(3)} = 0.75\epsilon + 24\tau \\
h_{ij-l-j}^{(3)} = 15\epsilon + 48\tau & h_{ij-l-l}^{(3)} = 0.75\epsilon + 24\tau & h_{ii-i-}^{(3)} = 6\tau & h_{ij-j-}^{(3)} = 12\tau \\
h_{ii-j-}^{(3)} = 24\tau & h_{ij-l-}^{(3)} = 24\tau & h_{ii-i-}^{(3)} = 12\tau & \\
h_{iji}^{(4)} = 12\tau & h_{ijl}^{(4)} = 24\tau & h_{ii-i}^{(4)} = h_{ij-i}^{(4)} = 24\tau & h_{ii-j}^{(4)} = 48\tau \\
h_{ijj-j}^{(4)} = h_{ij-l}^{(4)} = 48\tau & h_{iji-}^{(4)} = h_{iij-}^{(4)} = h_{ijl-}^{(4)} = 48\tau & h_{ij-i-}^{(4)} = h_{ij-l-}^{(4)} = 24\tau & \\
h_{ii}^{(5)} = 0.375\epsilon + 12\tau & \tilde{h}_{ii}^{(5)} = 2h_{ii}^{(5)} & h_{ii+1}^{(5)} = 7.5\epsilon + 48\tau & \tilde{h}_{ii+1}^{(5)} = 2h_{ii+1}^{(5)} \\
h_{ii+2}^{(5)} = 0.75\epsilon + 24\tau & \tilde{h}_{ii+2}^{(5)} = 2h_{ii+2}^{(5)} & h_{ii-}^{(5)} = 1.5\epsilon + 48\tau & \tilde{h}_{ii-}^{(5)} = 1/2h_{ii-}^{(5)} \\
h_{i(i+1)-}^{(5)} = 15\epsilon + 48\tau & \tilde{h}_{i(i+1)-}^{(5)} = 1/2h_{i(i+1)-}^{(5)} & & \\
h^{(5)} = 8\tau & & & \\
h_{ijj}^{(6)} = h_{iju}^{(6)} = 24\tau & h_{iij}^{(6)} = 8\tau & h_{ii-i}^{(6)} = h_{ij-i}^{(6)} = 48\tau & h_{ii-j}^{(6)} = h_{ij-j}^{(6)} = 24\tau \\
h_{iii-}^{(6)} = h_{iij-}^{(6)} = 24\tau & h_{iji-}^{(6)} = h_{iij-}^{(6)} = h_{iju-}^{(6)} = 48\tau & & \\
h_{ij-j-}^{(6)} = h_{ii-i-}^{(6)} = 48\tau & h_{ij-u-}^{(6)} = h_{ii-j-}^{(6)} = 24\tau & h_{ij-i-}^{(6)} = 48\tau & \\
h_{ijj}^{(7)} = 12\tau & h_{iij}^{(7)} = h_{ijl}^{(7)} = 24\tau & h_{ii-j}^{(7)} = h_{ij-j}^{(7)} = h_{ij-l}^{(7)} = 24\tau & \\
h_{iii-}^{(7)} = h_{iij-}^{(7)} = h_{iji-}^{(7)} = 48\tau & h_{ijj-}^{(7)} = h_{ijl-}^{(7)} = 48\tau & & \\
h_{ii-j-}^{(7)} = h_{ij-i-}^{(7)} = 48\tau & h_{ii-i-}^{(7)} = h_{ij-j-}^{(7)} = 24\tau & h_{ij-l-}^{(7)} = 48\tau & \\
h_{ii}^{(8)} = h_{ij}^{(8)} = 12\tau & h_{ii-}^{(8)} = h_{ij-}^{(8)} = 12\tau & & \\
h_{ij}^{(9)} = h_{ii}^{(9)} = 8\tau & & & 
\end{array}$$

Note, that coupling coefficients involving the constant shift  $\delta$  only occur in case of the product-type inter-map coupling energy.
